# Supplementary material
Source: PubMed Central journal article supplement (PMC9327375)
Supplement: 40900_2022_371_MOESM1_ESM.pdf [file 40900_2022_371_MOESM1_ESM.pdf]

**Additional file 1: Table S1.** Overview of digital considerations.

---

|                                           |                                                                                                                                                                                                                                                                                                                                                                                                                                                                                                                                                                                                                                                                                                                                                                                                                                                                                                                                                                                                                                                                                                                                                                                                                                                                                                                                                                              |
|-------------------------------------------|------------------------------------------------------------------------------------------------------------------------------------------------------------------------------------------------------------------------------------------------------------------------------------------------------------------------------------------------------------------------------------------------------------------------------------------------------------------------------------------------------------------------------------------------------------------------------------------------------------------------------------------------------------------------------------------------------------------------------------------------------------------------------------------------------------------------------------------------------------------------------------------------------------------------------------------------------------------------------------------------------------------------------------------------------------------------------------------------------------------------------------------------------------------------------------------------------------------------------------------------------------------------------------------------------------------------------------------------------------------------------|
| <b>TECHNOLOGICAL CONSIDERATIONS</b>       | <p><b>Preference</b></p> <ul style="list-style-type: none"><li>• Consider other less technological options, based on individual preferences, including: One to one phone calls may work best for those with limited access to the internet, or for more in-depth discussions.</li><li>• Teleconferences could also be an option, if a group discussion would be helpful but internet access is a challenge.</li></ul> <p><b>Access</b></p> <ul style="list-style-type: none"><li>• Does the channel, e.g. MS Teams, Zoom or MIRO etc. work where people are using different devices, e.g. smart phones, need for 2 screens etc.?</li><li>• Internet connection</li></ul> <p><b>Aptitude</b></p> <ul style="list-style-type: none"><li>• How familiar are participants with remote communication and what are people's preferences?</li><li>• Need to balance limitations on inclusivity (e.g. using people with more technological experience) against ensuring that sessions can operate smoothly and people able to contribute effectively.</li></ul>                                                                                                                                                                                                                                                                                                                      |
| <b>ONLINE FACILITATION CONSIDERATIONS</b> | <p><b>Developing roles</b></p> <ul style="list-style-type: none"><li>• Clear roles needed from the outset</li><li>• Power-dynamics and how recruiting a PPI Co-facilitator can provide supportive environment</li><li>• Consider 2nd Facilitator, specifically looking at inclusion through monitoring online chat and other channels used to communicate</li></ul> <p><b>Online Ground Rules and Etiquette</b></p> <ul style="list-style-type: none"><li>• Establish ground rules from the offset, with clear mechanisms to enable participation from all involved</li><li>• Recognise and respect that standard behavioural standards/expectations of digital meetings will differ from face-to-face, e.g. acknowledge potential interruptions due to caring responsibilities or technology, allowing people the space to respond and re-join the group</li></ul> <p><b>Time management</b></p> <ul style="list-style-type: none"><li>• Allowing enough time to cover agendas and topics</li><li>• Importance of communicating and sharing information beforehand to maximise time gaining insight from PPI during the sessions</li><li>• Recognising PPI participants may not be able or wish to stay longer than meeting end time.</li><li>• Recognising PPI participants may have responsibilities and may not be able to provide involvement at short notice</li></ul> |
| <b>CO-PRODUCTION CONSIDERATIONS</b>       | <p><b>Workshop numbers</b></p> <ul style="list-style-type: none"><li>• Depending on the configuration and systems used, including the ability to facilitate breakout sessions, participant numbers should reflect the additional challenges and requirements of digital PPI.</li></ul> <p><b>Co-Design preparation</b></p>                                                                                                                                                                                                                                                                                                                                                                                                                                                                                                                                                                                                                                                                                                                                                                                                                                                                                                                                                                                                                                                   |

---

- 
- Preparation for a digital workshop requires additional skills and time dedicated to creating a user-friendly experience.
  - Issues with trying and replicate ½ day face-to-face workshop on digital
  - Breaking down activities into smaller segments and ensure a clear plan for the session guided by facilitator
  - Consider sending out documents to review beforehand if appropriate, instead of trying to present them all in the platform.

#### **Collaborative working**

- Different activities could include Synchronous (where everyone is in contact at a specific time, mimicking a typical workshop) or asynchronous input, e.g. MIRO allows you to post outside the session forum/MS Teams for specific project or hashtag where people can post at different times more suitable for them. Also providing a video tutorial of how to use the platform to help people familiarise

---

### **RESOURCE CONSIDERATIONS**

#### **Additional resources**

- As well as the cost of coproduction platforms themselves, these could include phone credit/printing etc./software/budgeting for an increased frequency but shorter meetings
- Cost and time of sending equipment and resources to people who need this to partake

#### **Workshop numbers**

- Depending on the configuration and systems used, including the ability to facilitate breakout sessions, participant numbers should reflect the additional challenges and requirements of digital PPI.

#### **Training and Opportunities**

- Where a PPI Member has a role within the Research Team, time and resources should be afforded to their training and development in digital coproduction.

---

### **ETHICAL & WELFARE CONSIDERATIONS**

#### **Impacts of digital PPI on welfare**

- Change from face to face PPI impacting of wellbeing – isolated, anxiety, depression, lack of movement; On the other hand some may feel digital PPI is a better fit for them. Creating friendly space and social aspects.
- Certificates and follow ups of project progress to promote wellbeing and meaning
- Consider the need for additional breaks to recognise impact of working online – (consider those new to Techognoly use or health issues of the public & patient that may require adequate breaks)

#### **Consent & Safeguarding**

- Consider use of Peer Facilitator in next virtual room (or on different platform- being clear that run by separate/independent organisation
- Considering how support mechanisms have been adapted for a digital environment, e.g. use of Peer Support in an alternative virtual room, or accessible by pone before, during and after a PPI session

#### **Data security**

- Asking if we are ok to have session recorded
  - Addressing concerns about privacy on platforms and where research will be shared
-
